# Supplementary material for: Hox genes pattern the anterior-posterior axis of the juvenile but not the larva in a maximally indirect developing invertebrate, Micrura alaskensis (Nemertea)
Source: PubMed Central journal article supplement (PMC4426647; doi:10.1186/s12915-015-0133-5), 2015-04-11
Supplement: 12915_2015_133_MOESM1_ESM.pdf [file 12915_2015_133_MOESM1_ESM.pdf]

|                                 |           |                                                                 |               |
|---------------------------------|-----------|-----------------------------------------------------------------|---------------|
| Drosophila_malanogaster_antp    |           | RKRGRQTYTRYQTLELEKEFHFNRYLTRRRRIEIAHALCLTERQIKIWFQNRMMKWKKEN    |               |
| <b>Micrura_alaskensis_lab</b>   | NEYGFAQQ  | PNTGRTNFTNKQLTELEKEFHFNKYLTRARRIEIAAALGLNETQVKIWFQNRMMKQKRRM    | KEGLVQNNNTAT  |
| Lineus_sanguineus_hox1          | QRLCFAQQ  | PNTGRTNFTNKQLTELEKEFHFNKYLTRARRIEIAAALGLNETQVKIWFQNRMMKQKRRM    | KEGLVQNNNTTG  |
| Lingula_anatina_lab             | YQDYSANI  | PNMGRTNFSDKQLTELEKEFHFNKYLTRARRIEIAAALGLNETQVKIWFQNRMMKQKRRM    | KESQTLPTAAFG  |
| Euprymna_scolopes_lab           | GGLGAGCG  | NSTGRTNFTNKQLTELEKEFHFNKYLTRARRIEIAAALGLNETQVKIWFQNRMMKQKRRM    | KEAQTGTPGLGNT |
| Capitella_teleta_lab            | DFSVFAQQ  | PNMGRTNFTNKQLTELEKEFHFNKYLTRARRIEIAAALGLNETQVKIWFQNRMMKQKRRM    | KENTSTTPVSDS  |
| Tribolium_castaneum_lab         | SSMLSLNC  | LNTGRTNFTNKQLTELEKEFHFNKYLTRARRIEIASALQLNETQVKIWFQNRMMKQKRRM    | KEGLIPPEPISA  |
| Drosophila_melanogaster_lab     | SCSLSSNT  | NNSGRTNFTNKQLTELEKEFHFNRYLTRARRIEIANTLQLNETQVKIWFQNRMMKQKRRV    | KEGLIPADILTQ  |
| Branchiostoma_floridae_hox1     | EYCFSTSG  | PNNGRTNFTTKQLTELEKEFHFNKYLTRARRVEIAAALNLNETQVKIWFQNRMMKQKRRR    | KENGSTPGSGG   |
| <b>Micrura_alaskensis_pb</b>    | PSTFASNN  | PRRLRTAYTNSQLLELEKEFHFNKYLTRPRRIEIAASLDLTERQVKVWFQNRMMKYKRQS    | GKDGMMNENSVSS |
| Bugula_turrita_pb               |           | FHFNKYLTRPRRIEIAASLDLTERQVKV                                    |               |
| Capitella_teleta_pb             | GSSVASNH  | PRRLRTAYTNTQLLELEKEFHFNKYLTRPRRIEIAASLDLTERQVKVWFQNRMMKFKRQT    | GKSGSNSPDAEC  |
| Tribolium_castaneum_pb          | SSQQENGL  | PRRLRTAYTNTQLLELEKEFHFNKYLTRPRRIEIAASLDLTERQVKVWFQNRMMKHKRQT    | LGKQGGDDGDDKD |
| Drosophila_melanogaster_pb      | EFVPEENGL | PRRLRTAYTNTQLLELEKEFHFNKYLTRPRRIEIAASLDLTERQVKVWFQNRMMKHKRQT    | LSKTDDDEDNKDS |
| Branchiostoma_floridae_hox2     | SPTDQVNS  | SRRLRTVFTNTQLLELEKEFHFNKYLTRVCKPRRKEIASYLDLNERQVKIWFQNRMMRQKRRD | TKGRSEIGTDPG  |
| <b>Micrura_alaskensis_hox3</b>  | SGKELTOP  | PKRSRTAYTSAQLVLELEKEFHFNRYLCPRIEMAALLNLSEIQIKIWFQNRMMKYKDDQ     | KQKNLMEKIHME  |
| Lineus_sanguineus_hox3          | SELTOP    | PKRSRTAYTSAQLVLELEKEFHFNRYLCPRIEMAALLNLSEIQIKIWFQNRMMKYKDDQ     | KQKNLMEKIQLE  |
| Lingula_anatina_hox3            | FTNGEQP   | TKRARTAYTSAQLVLELEKEFHFNRYLCPRIEMAALLNLSEIQIKIWFQNRMMKHAKRN     | RSKKSCKSNSSN  |
| Bugula_turrita_hox3             |           | FHFNRYLCPRIEMAALLNLSEIQIKI                                      |               |
| Euprymna_scolopes_hox3          | QNIPECEQP | AKRARTAYTSAQLVLELEKEFHFNQYLCPRIEMAALLNLSEIQIKIWFQNRMMRFKKEK     | KLKVNMDKSGCG  |
| Capitella_teleta_hox3           | GQSQVQQP  | SKRARTAYTSAQLVLELEKEFHFNRYLCPRIEMAALLNLSEIQIKIWFQNRMMKYKDDQ     | KQKNLMEKQYAG  |
| Tribolium_castaneum_zen         | PQRTKPTA  | GKRARTAYTSAQLVLELEKEFHFNRYLCPRIEMAALLNLSEIQIKIWFQNRMMKHKKEQ     | MNKVSTPRSSPA  |
| Drosophila_melanogaster_zen     | NHDSQRVK  | LKRSRTAFTSVQLVLELEKEFHFNRYLCPRIEMAALLNLSEIQIKIWFQNRMMFKKDI      | QGHREPKNNAKL  |
| Branchiostoma_floridae_hox3     | SPGLGAA   | GKRARTAYTSAQLVLELEKEFHFNRYLCPRIEMAALLNLSEIQIKIWFQNRMMKYKKEQ     | KVKGGGSGGGSG  |
| <b>Micrura_alaskensis_dfd</b>   | NGNFNGGE  | NKRTRTAYTRHQILELEKEFHFNRYLTRRRRIEIAHALCLTERQIKIWFQNRMMKWKKEH    | KLPTNKKLRLPDA |
| Lineus_sanguineus_hox4          | NGNFNGSE  | SKRSRTAYTRHQILELEKEFHFNRYLTRRRRIEIAHALDLSEIQIKIWFQNRMMKWKKEH    | KLPTNKKLRLP   |
| Bugula_turrita_dfa              | DGLD      | PKRARTAYTRHQILELEKEFHFNRYLTRRRRIEIAHDLSEIQIKIWFQNRMMKWKKEH      | KLPTNKKKIPEI  |
| Bugula_turrita_dfdb             | FDGD      | NKRTRTAYTRQVLELEKEFHFNRYLTRRRRIEIAHDLSEIQIKIWFQNRMMKWKKDH       | KLSSSKGRLPPI  |
| Capitella_teleta_dfd            | ANGGFVOD  | SKRTRTAYTRHQILELEKEFHFNRYLTRRRRIEIAHDLSEIQIKIWFQNRMMKWKKEH      | KLPTNKKTRLTD  |
| Tribolium_castaneum_dfd         | GTFAPOME  | PKRQRTAYTRHQILELEKEFHFNRYLTRRRRIEIAHDLSEIQIKIWFQNRMMKWKKDN      | KLPTNKNVRRKT  |
| Drosophila_melanogaster_dfd     | GSYQPEME  | PKRQRTAYTRHQILELEKEFHFNRYLTRRRRIEIAHDLSEIQIKIWFQNRMMKWKKDN      | KLPTNKNVRRKT  |
| Branchiostoma_floridae_hox4     | STSYNGQD  | TKRRTAYTRQVLELEKEFHFNRYLTRRRRIEIAHSLGLTERQIKIWFQNRMMKWKKDN      | RLPTNKKTRSSA  |
| <b>Micrura_alaskensis_scr</b>   | HENVNGME  | SKRTRTSYTRYQTLELEKEFHFNRYLTRRRRIEIAHALNLTERQIKIWFQNRMMKWKKEQ    | KLAHITKSTAMK  |
| Lingula_anatina_scr             | CMNGIE    | SKRTRTSYTRHQILELEKEFHFNRYLTRRRRIEIAHALNLTERQIKIWFQNRMMKWKKEQ    | KLAHLTKTEAMK  |
| Euprymna_scolopes_scr           | YSQDPDGE  | SKRSRTSYTRHQILELEKEFHFNRYLTRRRRIEIAHALNLTERQIKIWFQNRMMKWKKEH    | KLSHIAKNMNC   |
| Capitella_teleta_scr            | GHDTSNAD  | NKRTRTSYTRHQILELEKEFHFNRYLTRRRRIEIAHSLNLTERQIKIWFQNRMMKWKKEH    | KLAHLAKSQAQK  |
| Tribolium_castaneum_scr         | STVNANGE  | TKRQRTSYTRYQTLELEKEFHFNRYLTRRRRIEIAHALCLTERQIKIWFQNRMMKWKKEH    | KMASMNIVPYHM  |
| Drosophila_melanogaster_scr     | STVNANGE  | TKRQRTSYTRYQTLELEKEFHFNRYLTRRRRIEIAHALCLTERQIKIWFQNRMMKWKKEH    | KMASMNIVPYHM  |
| Branchiostoma_floridae_hox5     | ACTG      | NKRTRTAYTRYQTLELEKEFHFNRYLTRRRRIEIAHALCLTERQIKIWFQNRMMKWKKEN    | KLKLSLQCCQQTQ |
| <b>Micrura_alaskensis_lox5</b>  | LNGEMPIE  | QKRTRQTYTRYQTLELEKEFHFNKYLTRRRRIEIAHALGLTERQIKIWFQNRMMKWKKEN    | NLQKLTGPNTKI  |
| Lineus_sanguineus_hox6          | RFRNANRE  | QKRTRQTYTRYQTLELEKEFHFNKYLTRRRRIEIAHALGLTERQIKIWFQNRMMKWKKEN    | NLQKLTGPNTKL  |
| Lingula_anatina_lox5            | ICYE      | QKRTRQTYTRYQTLELEKEFHFNRYLTRRRRIEIAHHLGLTERQIKIWFQNRMMKWKKEN    | NIPKLTGPNQKI  |
| Bugula_turrita_lox5             | TCYE      | QKRTRQTYTRYQTLELEKEFHFNRYLTRRRRIEIAHHLGLTERQIKIWFQNRMMKWKKEN    | NIAKLTG       |
| Euprymna_scolopes_lox5          | EETAYE    | QKRTRQTYTRYQTLELEKEFHFNRYLTRRRRIEIAHSLGLTERQIKIWFQNRMMKWKKEN    | NVSKLTGPNKSK  |
| Capitella_teleta_lox5           | SGADFCYE  | QKRTRQTYTRYQTLELEKEFHFNRYLTRRRRIEIAHALQLTERQIKIWFQNRMMKYKKN     | NISKLTGPNGEL  |
| Tribolium_castaneum_ftz         | HGDSSATG  | NKRTRQTYTRYQTLELEKEFHFNKYLTRRRRIEIAESLRLTERQIKIWFQNRMMKAKKDT    | KFTEQSVTSTFD  |
| Drosophila_melanogaster_ftz     | TLASDCKD  | SKRTRQTYTRYQTLELEKEFHFNRYLTRRRRIEIANALSLSERQIKIWFQNRMMKSKKDR    | TLDSSPEHCAG   |
| <b>Micrura_alaskensis_antp</b>  | MKSQFQPD  | RKRGRQTYTRYQTLELEKEFHFNKYLTRRRRIEIAHALCLTERQIKIWFQNRMMKWKKEN    | KPSEGGTSCKEE  |
| Lineus_sanguineus_hox7          | IFVFIGPD  | RKRGRQTYTRYQTLELEKEFHFNKYLTRRRRIEIAHALCLTERQIKIWFQNRMMKWKKEE    | NKQPVGIVCKEE  |
| Lingula_anatina_antp            | PD        | RKRGRHTYSRHQILELEKEFHFNRYLTRRRRIEIAHALCLTERQIKIWFQNRMMKWKKEN    | KGIELSRDSDPPQ |
| Euprymna_scolopes_antp          | MRSQYQPH  | RKRGRQTYTRYQTLELEKEFHFNRYLTRRRRIEIAHALCLTERQIKIWFQNRMMKWKKEN    | KAEMPGTENCKP  |
| Capitella_teleta_antp           | NQLKAPPE  | RKRGRQTYTRYQTLELEKEFHFNRYLTRRRRIEIAHALCLTERQIKIWFQNRMMKWKKEN    | RQIEVLRQHTDD  |
| Tribolium_castaneum_antp        | PWMRSQFE  | RKRGRQTYTRYQTLELEKEFHFNRYLTRRRRIEIAHALCLTERQIKIWFQNRMMKWKKEN    | KTKEGGGSECGG  |
| Branchiostoma_floridae_hox6     | SQTAMQEE  | KKRGRQTYTRYQTLELEKEFHFNKYLTRRRRIEIAHLLGLTERQIKIWFQNRMMKWKKEN    | KIPSLNATTINQ  |
| Branchiostoma_floridae_hox7     | PE        | RKRGRQTYTRYQTLELEKEFHFNKYLTRRRRIEIAHALCLTERQIKIWFQNRMMKWKKEN    | KLESCLKQPAES  |
| Drosophila_antp                 |           | RKRGRQTYTRYQTLELEKEFHFNRYLTRRRRIEIAHALCLTERQIKIWFQNRMMKWKKEN    | KTKEGPGSGGEG  |
| <b>Micrura_alaskensis_lox4</b>  | IVGPNSAQ  | RRRGRQTYTRYQTLELEKEFHFNRYLTRRRRIEIAHSLCLTERQIKIWFQNRMMKWKKEE    | QQIKELNDSTKD  |
| Lingula_anatina_lox4            | PNSAQ     | RRRGRQTYTRYQTLELEKEFHFNRYLTRRRRIEIAHSLCLTERQIKIWFQNRMMKWKKEE    | QQIKELNDTLKK  |
| Euprymna_scolopes_lox4          | IVGPNSSQ  | RRRGRQTYTRYQTLELEKEFHFNRYLTRRRRIEIAHSLCLTERQIKIWFQNRMMKWKKEE    | QQIREMNGACRS  |
| Capitella_teleta_lox4           | VVXPNSSQ  | RRRGRQTYTRYQTLELEKEFHFNRYLTRRRRIEIAHSLCLTERQIKIWFQNRMMKWKKEE    | QQIKDLNGLDGG  |
| Lingula_anatina_lox2            |           | FNFYLTRRRRIEIAHSLCLTERQIKI                                      |               |
| Capitella_teleta_lox2           | IVGPNSNQ  | RRRGRQTYTRYQTLELEKEFHFNRYLTRRRRIEIAHSLCLTERQIKIWFQNRMMKWKKEE    | QAIKELNEKEKT  |
| Tribolium_castaneum_abda        | VCGPNCPP  | RRRGRQTYTRYQTLELEKEFHFNRYLTRRRRIEIAHSLCLTERQIKIWFQNRMMKWKKEE    | RAVKEINEQARR  |
| Drosophila_melanogaster_abda    | FNGPNCPP  | RRRGRQTYTRYQTLELEKEFHFNRYLTRRRRIEIAHSLCLTERQIKIWFQNRMMKWKKEE    | RAVKEINEQARR  |
| Tribolium_castaneum_ubx         | MTFGANGL  | RRRGRQTYTRYQTLELEKEFHFNRYLTRRRRIEIAHSLCLTERQIKIWFQNRMMKWKKEE    | QAIKELNEQEKQ  |
| Drosophila_melanogaster_ubx     | DWLGTNGL  | RRRGRQTYTRYQTLELEKEFHFNRYLTRRRRIEIAHSLCLTERQIKIWFQNRMMKWKKEE    | QAIKELNEQEKQ  |
| Branchiostoma_floridae_hox8     | PE        | RRRGRQTYTRYQTLELEKEFHFNRYLTRRRRIEIAHALGLTERQIKIWFQNRMMKWKKEA    | AMLCPKPAETET  |
| <b>Micrura_alaskensis_post2</b> | NNSCTEPR  | TRKKRKPYPYTRYQTMVLENEFFLNSSYITRQKRWEISCKLHLTERQVKVWFQNRMMKWKKEN | SRAKVKSEVENT  |
| Lineus_sanguineus_hox9          | PFSTTEPR  | TRKKRKPYPYTRYQTMVLENEFFLNSSYITRQKRWEISCKLHLTERQVKVWFQNRMMKWKKEN | ARSKVKTRMTDA  |
| Lingula_anatina_post2           |           | TRKKRKPYPYTRYQTMVLENEFFLNSSYITRQKRWEISCKLHLTERQVKVWFQNRMMKWKKEN | ERAKALFKSEDI  |
| Bugula_turrita_post2            | GSSS      | SRKKRKPYPYTRYQTMVLENEFFLNSSYITRQKRWEISCKLHLTERQVKVWFQNRMMKWKKEN | DRAKNAQLTVQQ  |
| Euprymna_scolopes_post2         | SQSHETK   | GRKKRKPYPYTRYQTMVLENEFFLNSSYITRQKRWEISCKLHLTERQVKVWFQNRMMKWKKEN | ERAKARLREDRE  |
| Capitella_teleta_post2          | SQNDAPK   | QRKKRKPYPYTRYQTMVLENEFFLNSSYITRQKRWEISCKLHLTERQVKVWFQNRMMKWKKEN | ERAKSLIKDHEP  |
| Lingula_anatina_post1           | TTLEAVIH  | MRKKRKPYPYTRYQTMVLENEFFLNSSYITRQKRWEISCKLHLTERQVKVWFQNRMMKWKKEN | GGKQT         |
| Euprymna_scolopes_post1         | ALPESAIA  | LRKKRKPYPYTRYQTMVLENEFFLNSSYITRQKRWEISCKLHLTERQVKVWFQNRMMKWKKEN | KRDETLKTQTPN  |
| Capitella_teleta_post1          | SSSKSDVN  | PKKKRKPYPYTRYQTMVLENEFFLNSSYITRQKRWEISCKLHLTERQVKVWFQNRMMKWKKEN | TKRAKVQSDLFM  |
| Tribolium_castaneum_abdB        | LEWTGQVT  | VRKKRKPYPYTRYQTMVLENEFFLNSSYITRQKRWEISCKLHLTERQVKVWFQNRMMKWKKEN | QRQAQQQNNNN   |
| Drosophila_melanogaster_abdB    | HEWTGQVS  | VRKKRKPYPYTRYQTMVLENEFFLNSSYITRQKRWEISCKLHLTERQVKVWFQNRMMKWKKEN | QRQANQQNNNN   |
| Branchiostoma_floridae_hox9     | PGWMNHS   | SRKKRCPYTRYQTMVLENEFFLNSSYITRQKRWEISCKLHLTERQVKVWFQNRMMKWKKEN   |               |
| Branchiostoma_floridae_hox10    | TSWMAPRV  | GRKKRCPYTRYQTMVLENEFFLNSSYITRQKRWEISCKLHLTERQVKVWFQNRMMKWKKEN   |               |
| Branchiostoma_floridae_hox11    | SNWMSAKS  | TRKKRCPYTRYQTMVLENEFFLNSSYITRQKRWEISCKLHLTERQVKVWFQNRMMKWKKEN   | GRAM          |
| Branchiostoma_floridae_hox12    | DVWWKLQS  | SRKKRCPYTRYQTMVLENEFFLNSSYITRQKRWEISCKLHLTERQVKVWFQNRMMKWKKEN   | QRHEEE        |
| Branchiostoma_floridae_hox13    | ADQSVARG  | GRKKRCPYTRYQTMVLENEFFLNSSYITRQKRWEISCKLHLTERQVKVWFQNRMMKWKKEN   |               |
| Branchiostoma_floridae_hox14    | GGGSLTKP  | VRPKRKPYPYTRYQTMVLENEFFLNSSYITRQKRWEISCKLHLTERQVKVWFQNRMMKWKKEN |               |
| <b>Micrura_alaskensis_cdx</b>   | PNKWKTRT  | KDKYRVVYSDRQRLLELEKEFHFNRYLTRRRRIEIAHALCLTERQIKIWFQNRMMKWKKEN   | KKDQMSGQDVK   |
| Capitella_teleta_cdx            |           | KDKYRVVYSDRQRLLELEKEFHFNRYLTRRRRIEIAHALCLTERQIKIWFQNRMMKWKKEN   | KMEEALSTSDS   |
| Tribolium_castaneum_cdx         |           | KDKYRVVYSDRQRLLELEKEFHFNRYLTRRRRIEIAHALCLTERQIKIWFQNRMMKWKKEN   | KREEVTOQDPS   |
| Branchiostoma_floridae_cdx      |           | KDKYRVVYSDRQRLLELEKEFHFNRYLTRRRRIEIAHALCLTERQIKIWFQNRMMKWKKEN   |               |
| Drosophila_melanogaster_cdx     | PQPGKTRT  | KDKYRVVYSDRQRLLELEKEFHFNRYLTRRRRIEIAHALCLTERQIKIWFQNRMMKWKKEN   | KGSDPNVMGVG   |
