# Supplementary material for: Hox genes pattern the anterior-posterior axis of the juvenile but not the larva in a maximally indirect developing invertebrate, Micrura alaskensis (Nemertea)
Source: PubMed Central journal article supplement (PMC4426647; doi:10.1186/s12915-015-0133-5), 2015-04-11
Supplement: 12915_2015_133_MOESM2_ESM.pdf [file 12915_2015_133_MOESM2_ESM.pdf]

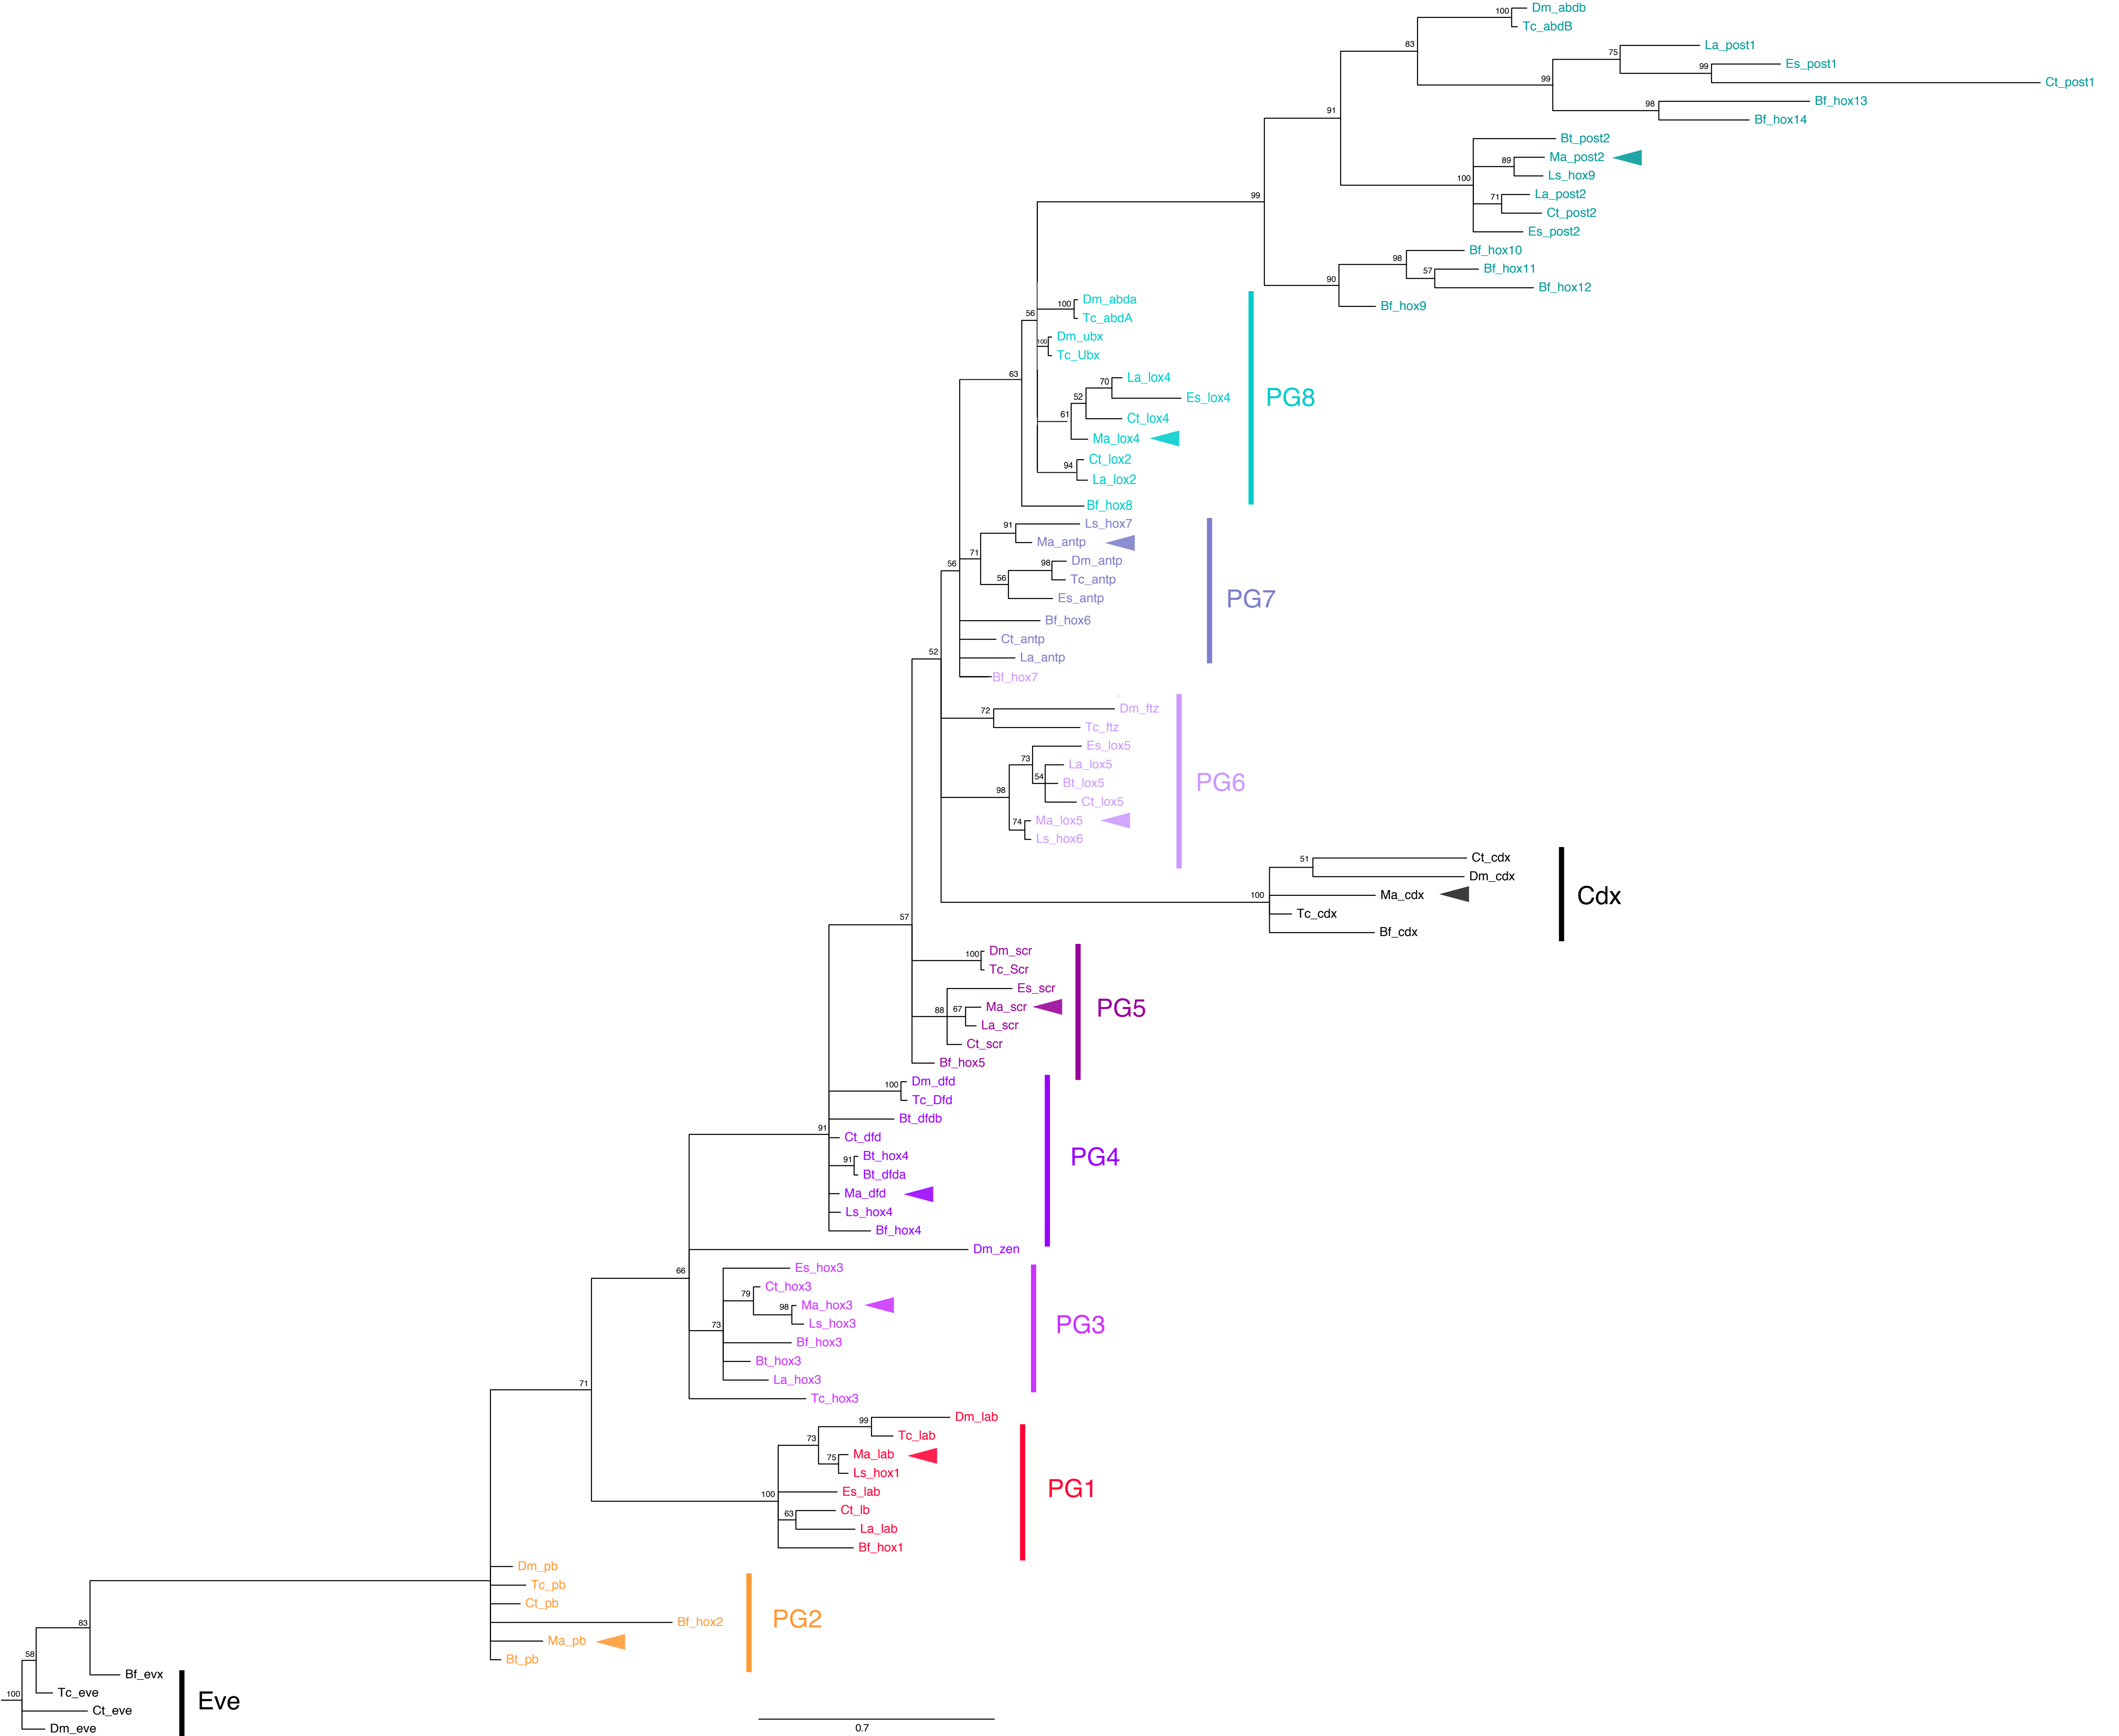

0.7
